# Supplementary material
Source: ML conference proceedings conference paper supplement (https://openaccess.thecvf.com/content/CVPR_2020/html/Li_Through_the_Looking_CVPR_2020_paper.html)
Supplement: Supplementary file 2 [file Li_Through_the_Looking_CVPR_2020_supplemental.zip]

Archive with 5 entries (4 files):
- supp.pdf
- __MACOSX/
- __MACOSX/._supp.pdf
- video.mp4
- __MACOSX/._video.mp4
